# Supplementary material for: Water-soluble magnetic glyconanoparticles based on metal-doped ferrites coated with gold: Synthesis and characterization
Source: Royal Society of Chemistry journal article supplement (doi:10.1039/c0jm01756f), 2010-01-01
Supplement: c0jm01756f.pdf [file c0jm01756f.pdf]

## **SUPPORTING INFORMATION**

### **Water-soluble magnetic glyconanoparticles based on metal-doped ferrites coated with gold: synthesis and characterization**

Juan Gallo, Isabel García, Daniel Padro, Blanca Arnáiz, and Soledad Penadés

*Laboratory of GlycoNanotechnology, Biofunctional Nanomaterials Unit, CIC biomaGUNE/CIBER-BBN, Pº de Miramón 182, 20009 San Sebastian, Spain*

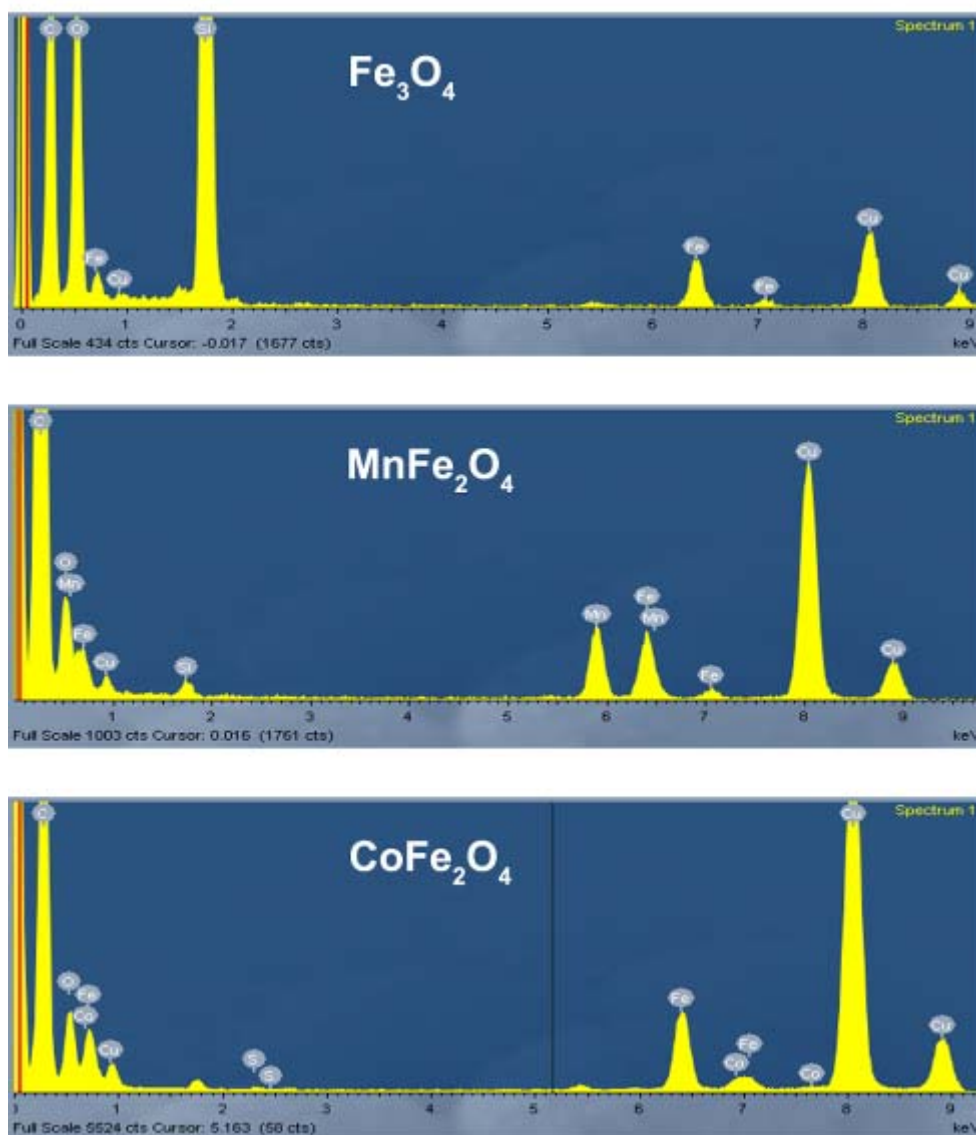

**SI.** EDX spectra of  $\text{Fe}_3\text{O}_4$  (upper),  $\text{MnFe}_2\text{O}_4$  (centre) and  $\text{CoFe}_2\text{O}_4$  (lower). Peaks from Cr (around 5.5 KeV) and Si (around 1.7 KeV) are present in the three spectra coming from the sample holder.

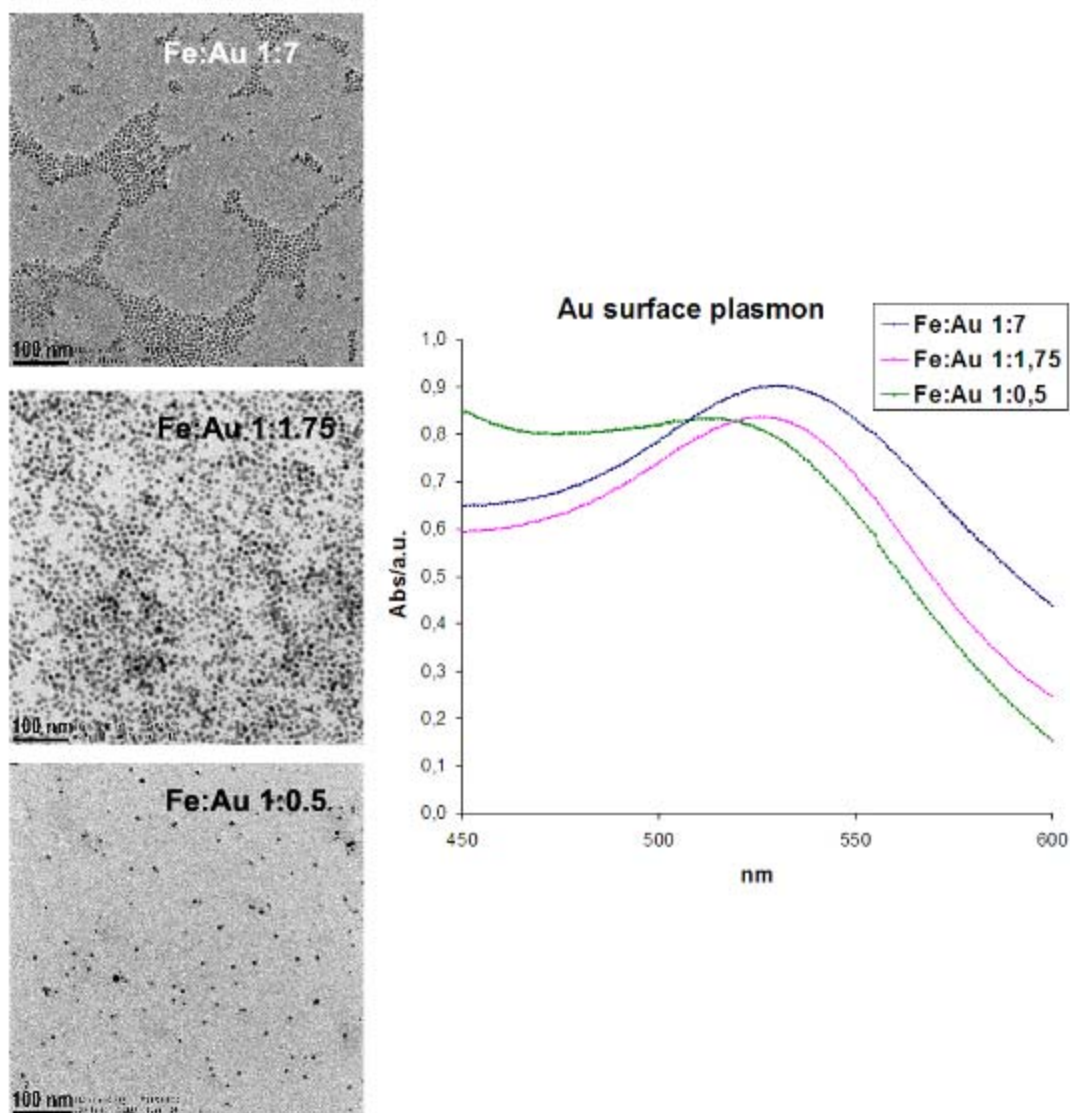

S2. Left: TEM micrograph of the  $\text{Fe}_3\text{O}_4@Au$  nanoparticles obtained from the coating reactions at different Fe/Au ratio. Right: UV-Vis spectra of the same nanoparticles showing a red shift in the position of the Au surface plasmon resonant peak.

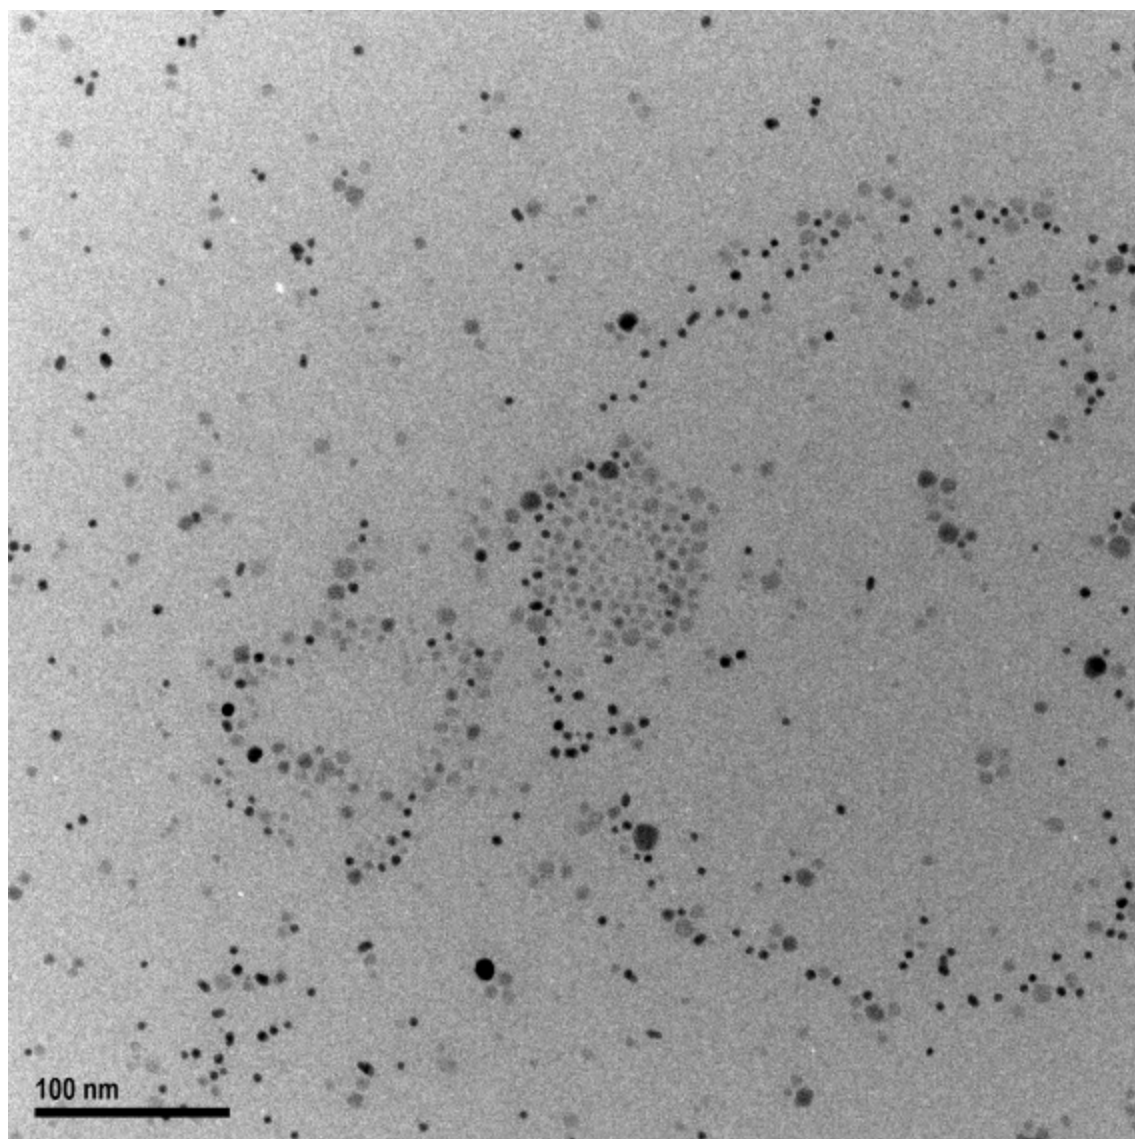

S3. TEM micrograph of nanoparticles obtained under Zhong's conditions for the coating of  $\text{MnFe}_2\text{O}_4$  nanoparticles.

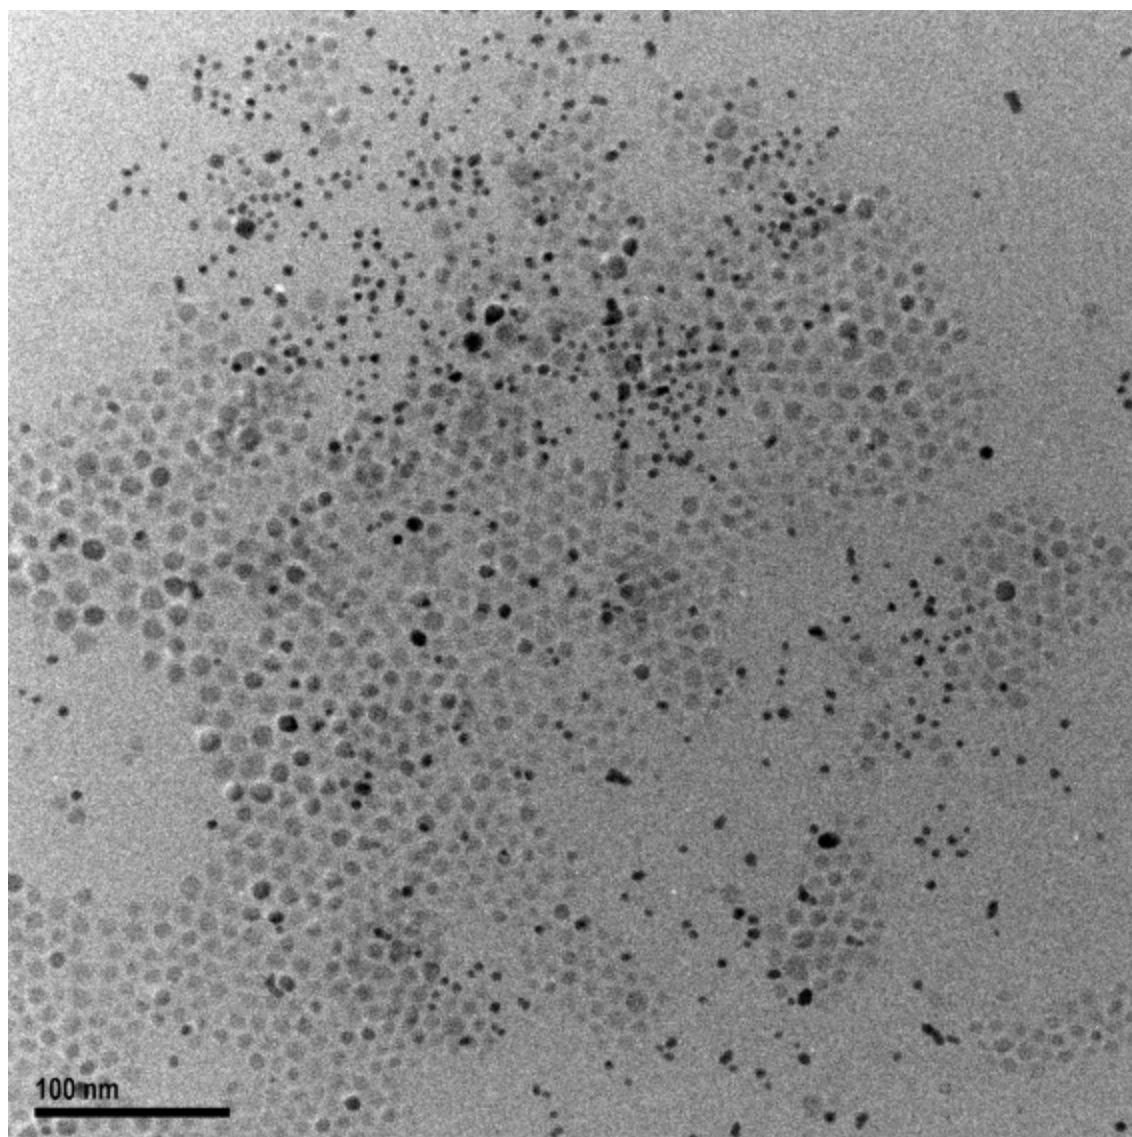

**S4.** TEM micrograph of a failed gold coating reaction of MnFe<sub>2</sub>O<sub>4</sub> nanoparticles, after purification by magnetic sorting out and centrifugation.

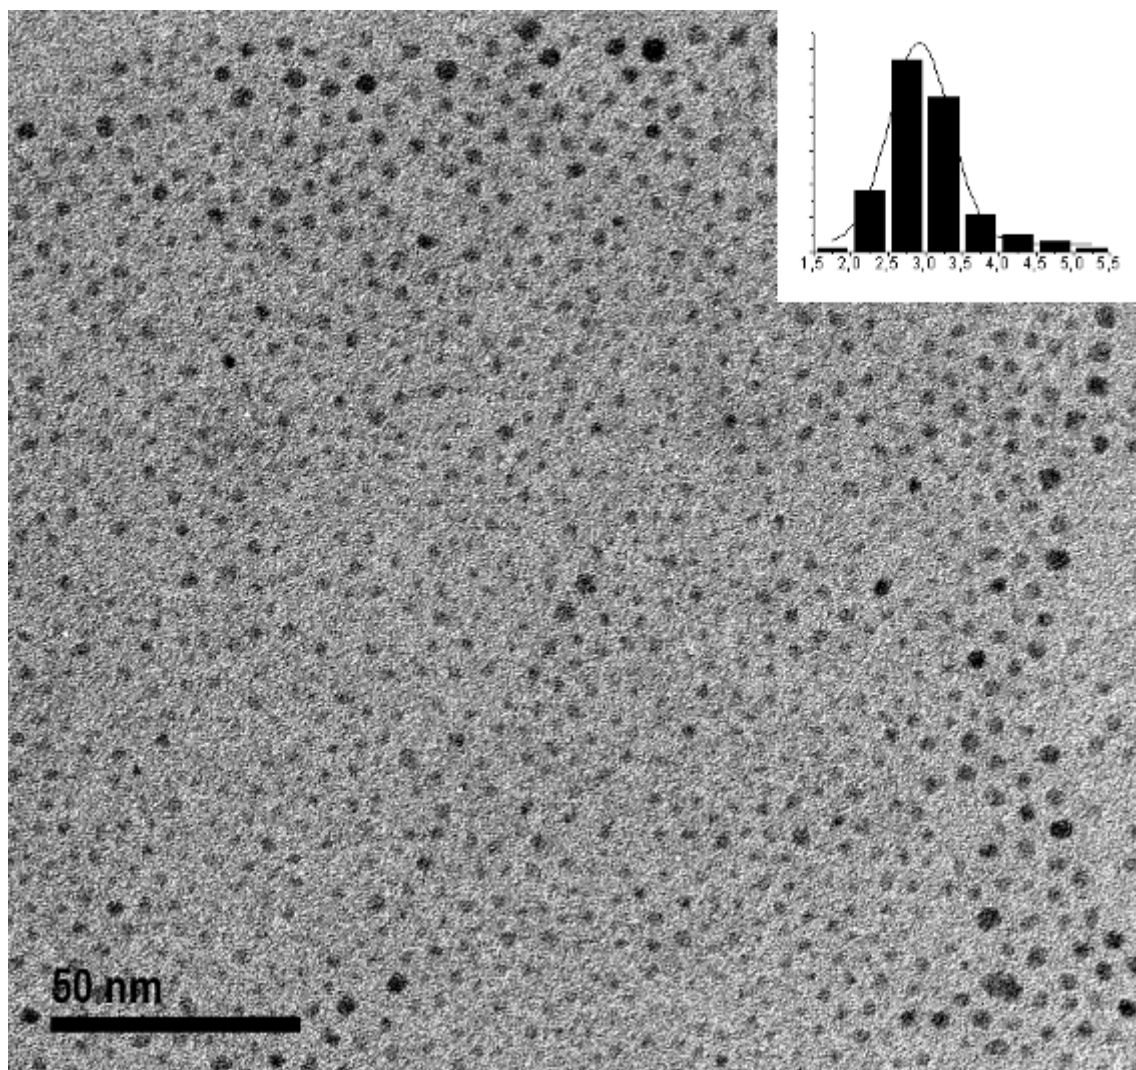

S5. TEM micrograph of 3.2 nm Fe<sub>3</sub>O<sub>4</sub> nanoparticles. Insert, size distribution diagram of the sample.



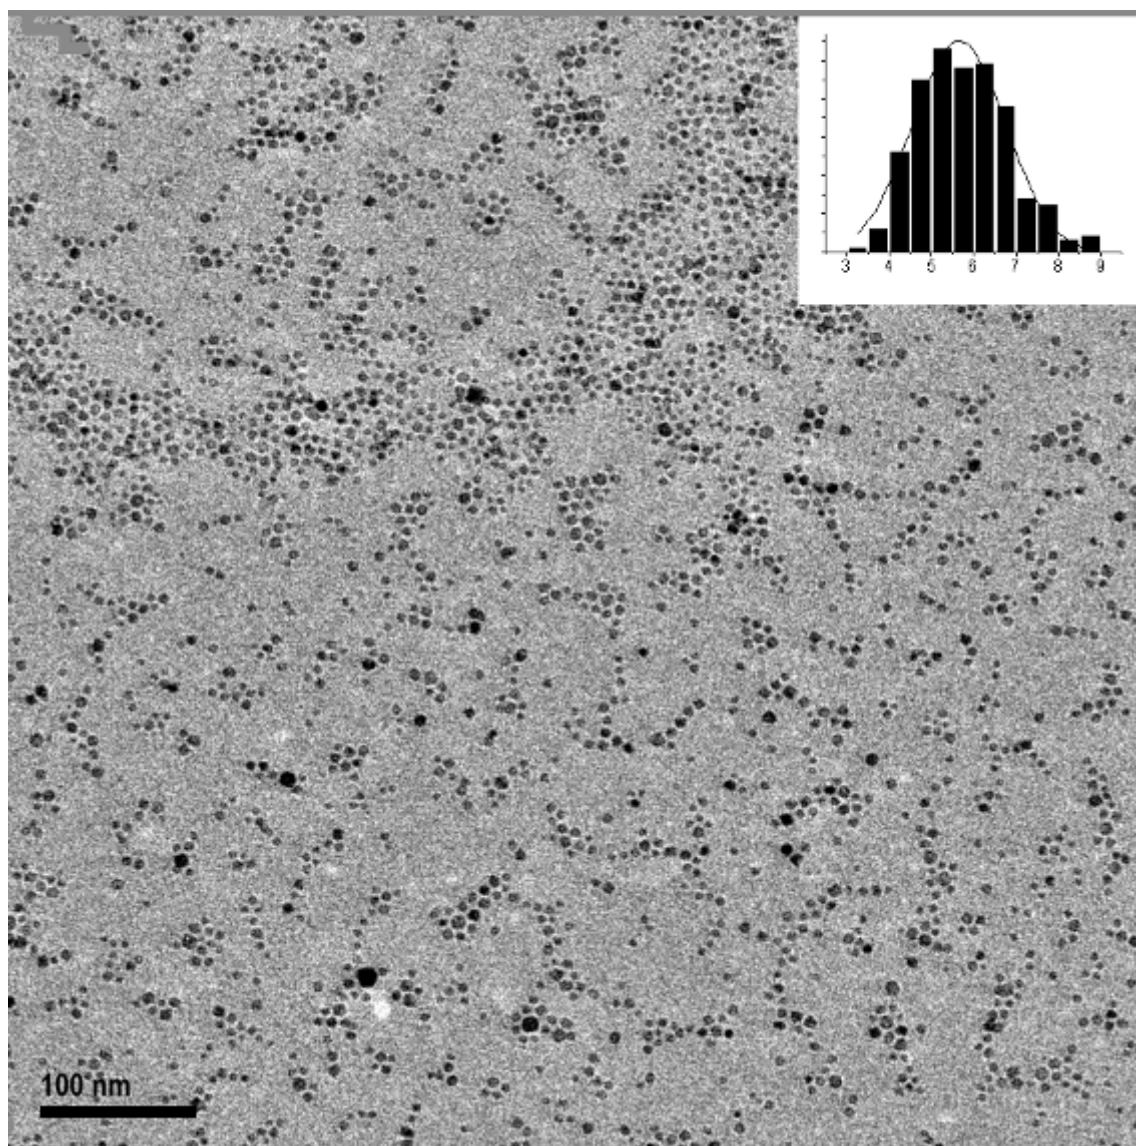

**S6.** TEM micrograph of 6.1 nm  $\text{MnFe}_2\text{O}_4$  nanoparticles. Insert, size distribution diagram of the sample.

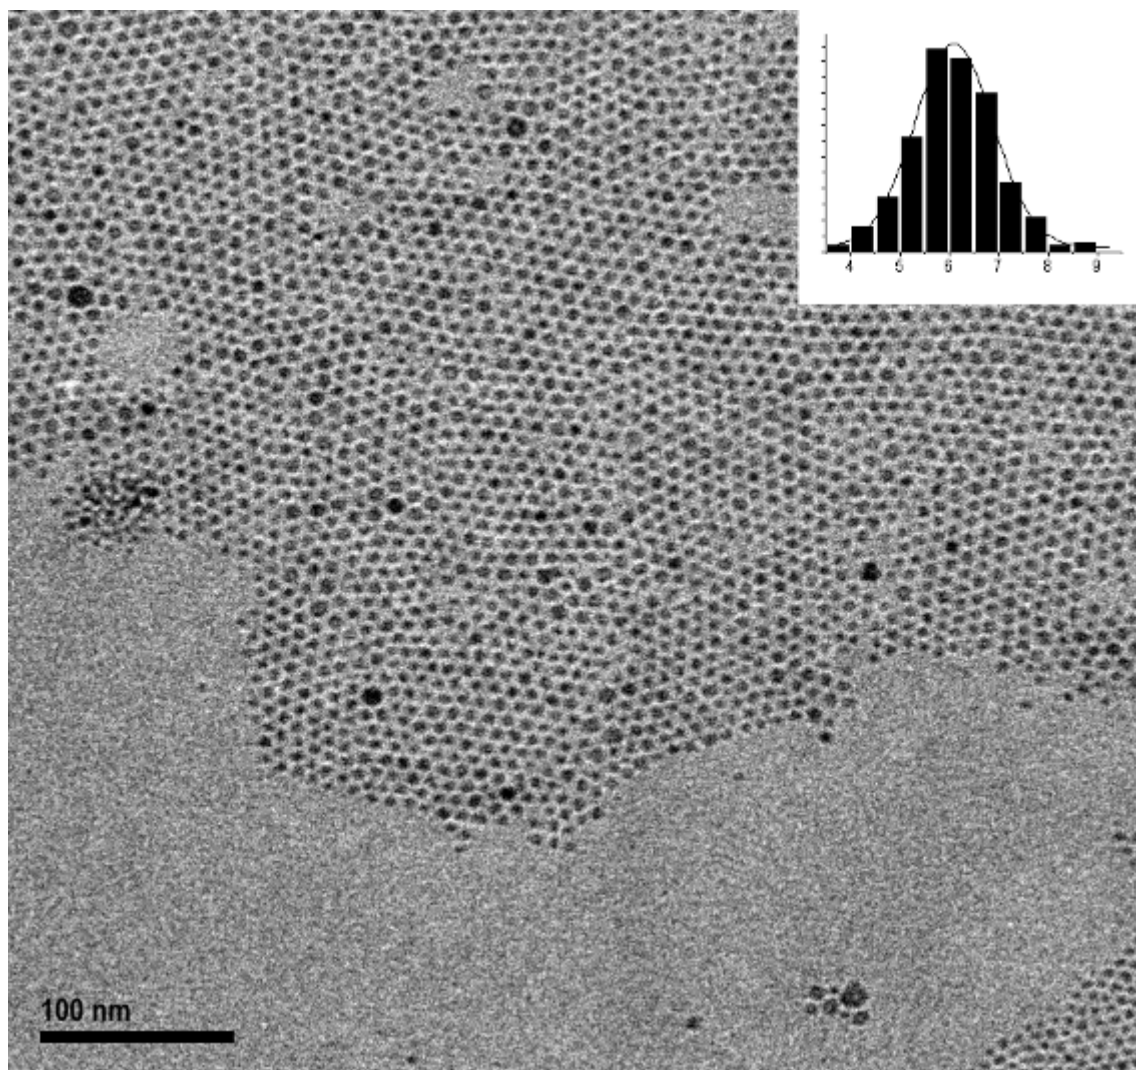

S7. TEM micrograph of 6.2 nm  $\text{CoFe}_2\text{O}_4$  nanoparticles. Insert, size distribution diagram of the sample.



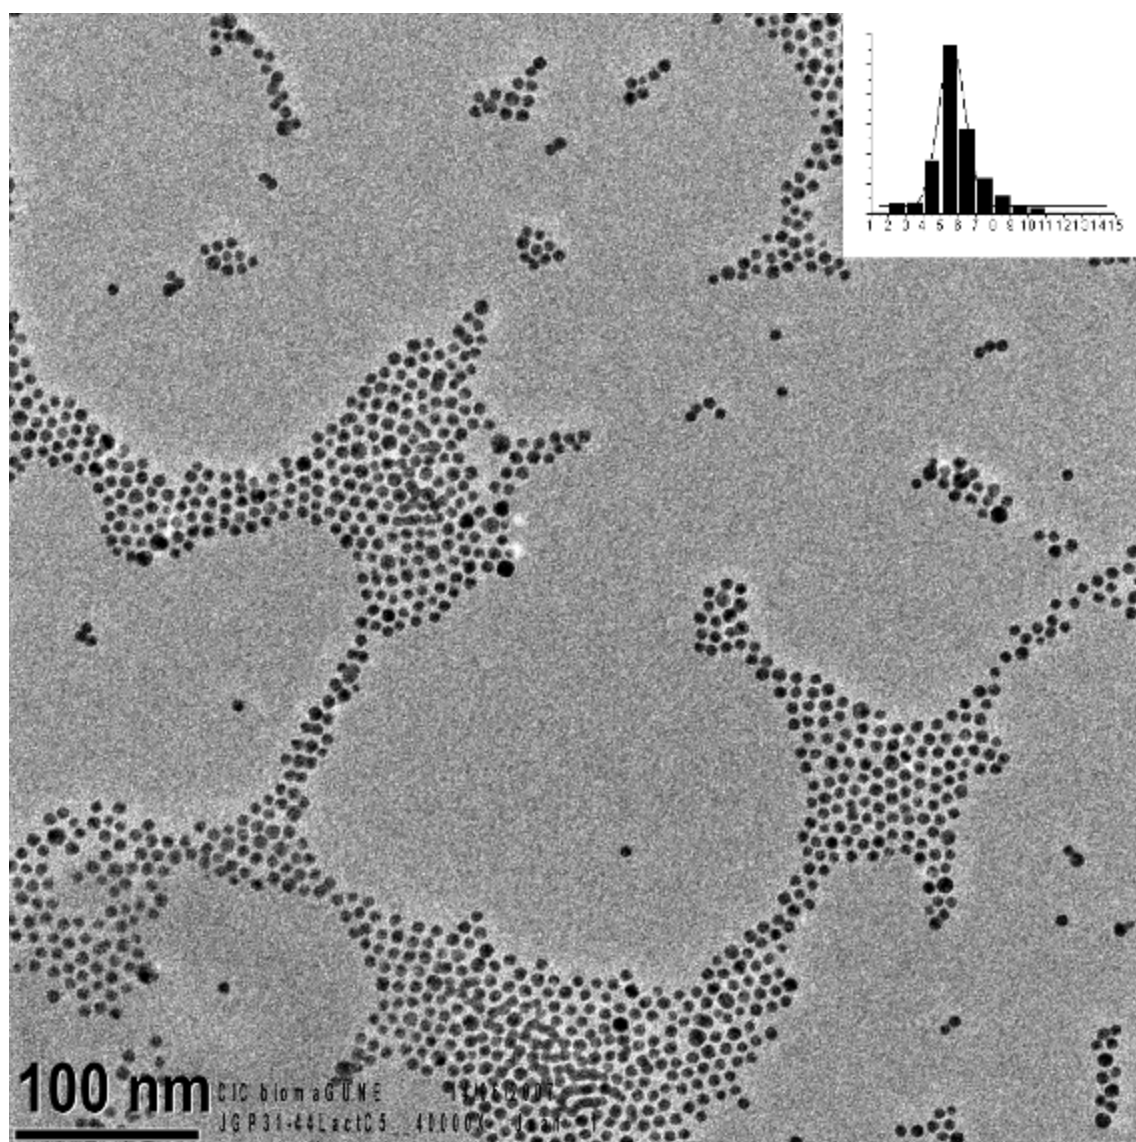

**S8.** TEM micrograph of 5.4 nm Fe<sub>3</sub>O<sub>4</sub>@Au nanoparticles. Insert, size distribution diagram of the sample.

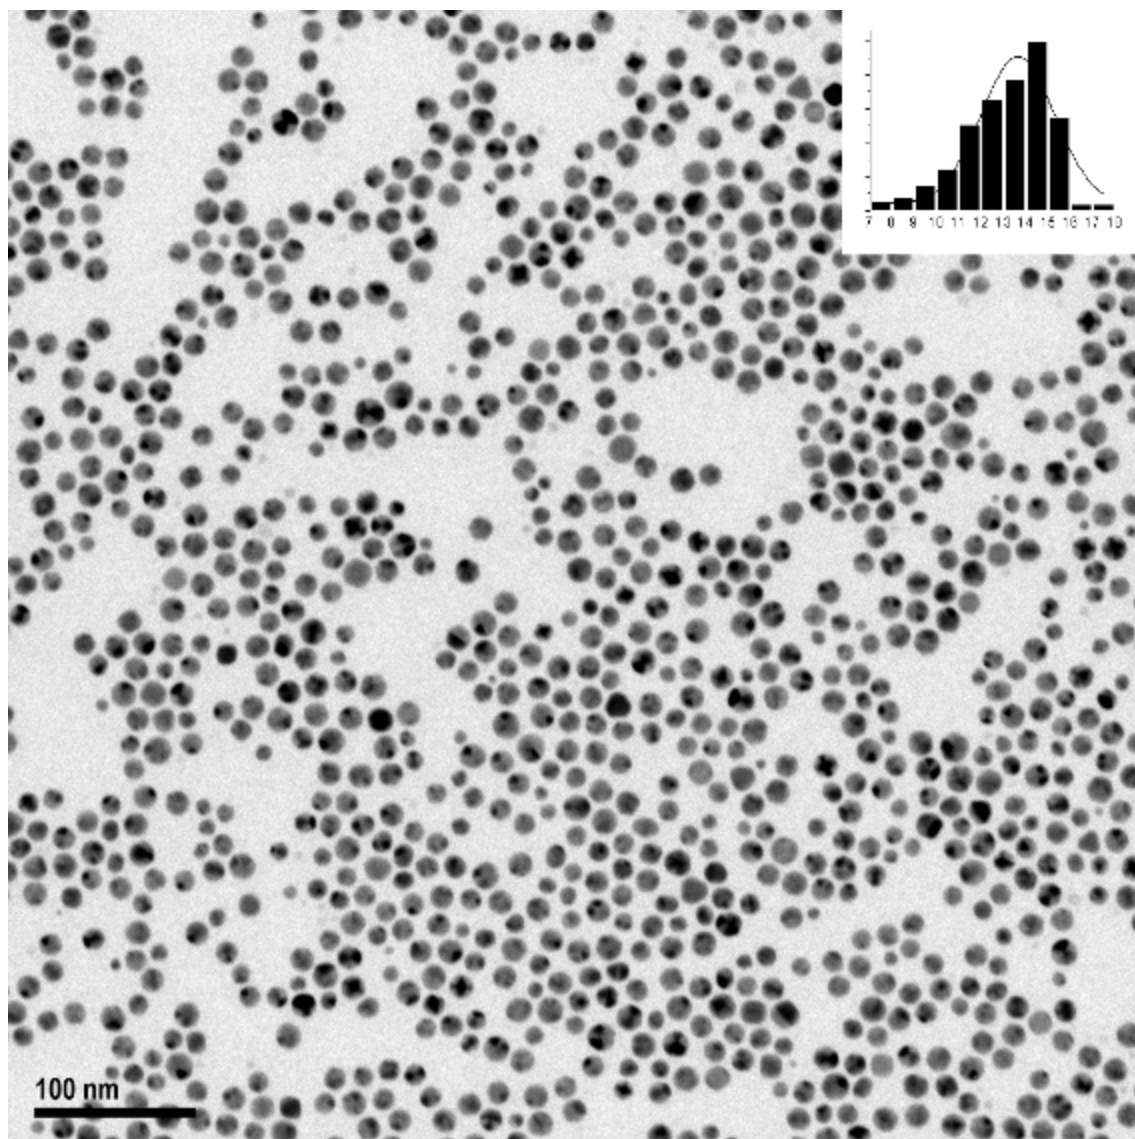

**S9.** TEM micrograph of 13.5 nm MnFe<sub>2</sub>O<sub>4</sub>@Au nanoparticles. Insert, size distribution diagram of the sample.

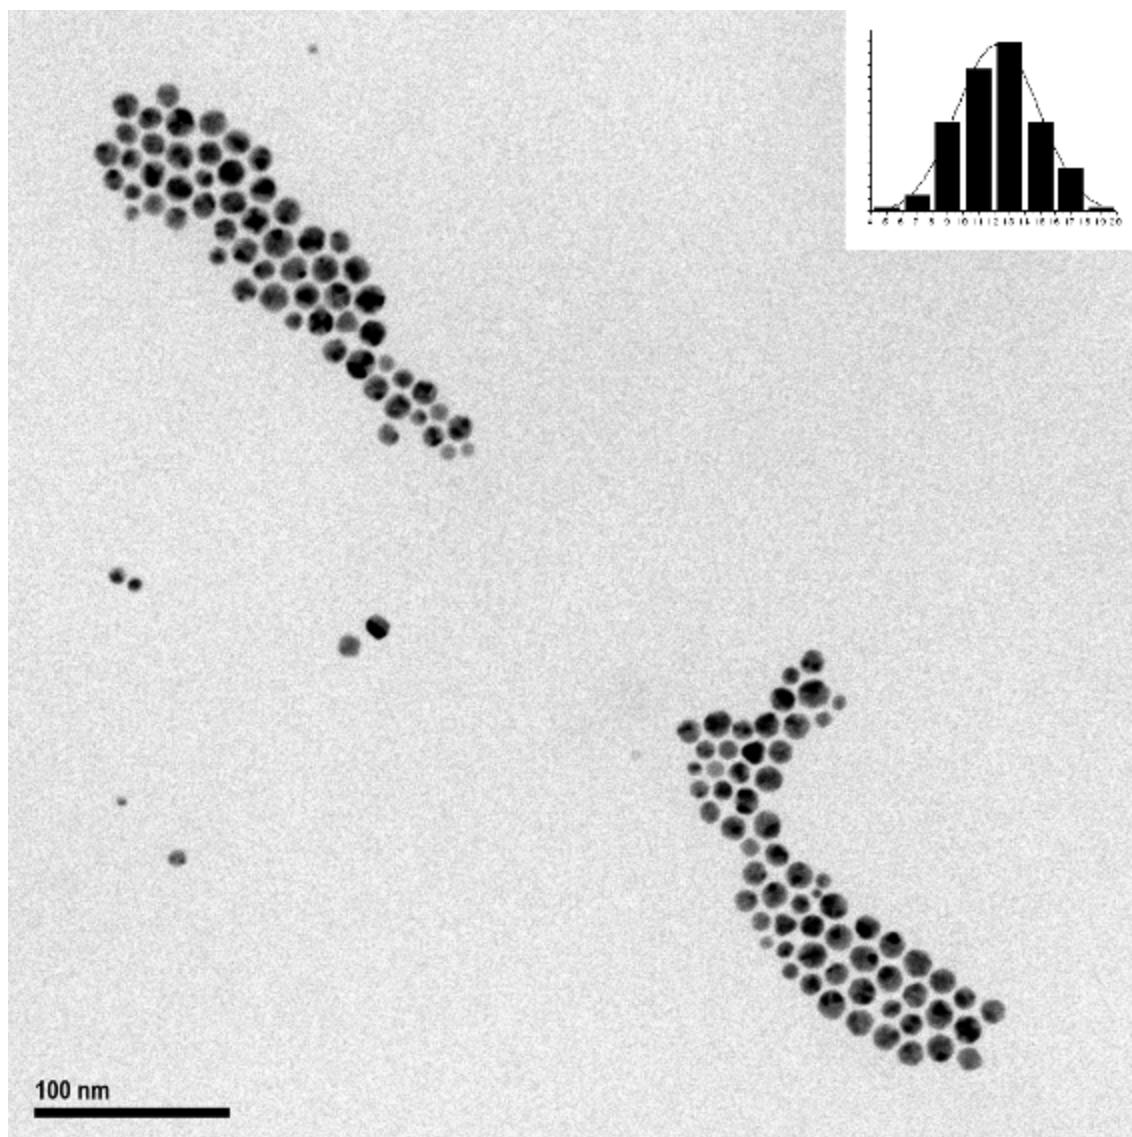

**S10.** TEM micrograph of 12.5 nm CoFe<sub>2</sub>O<sub>4</sub>@Au nanoparticles. Insert, size distribution diagram of the sample.

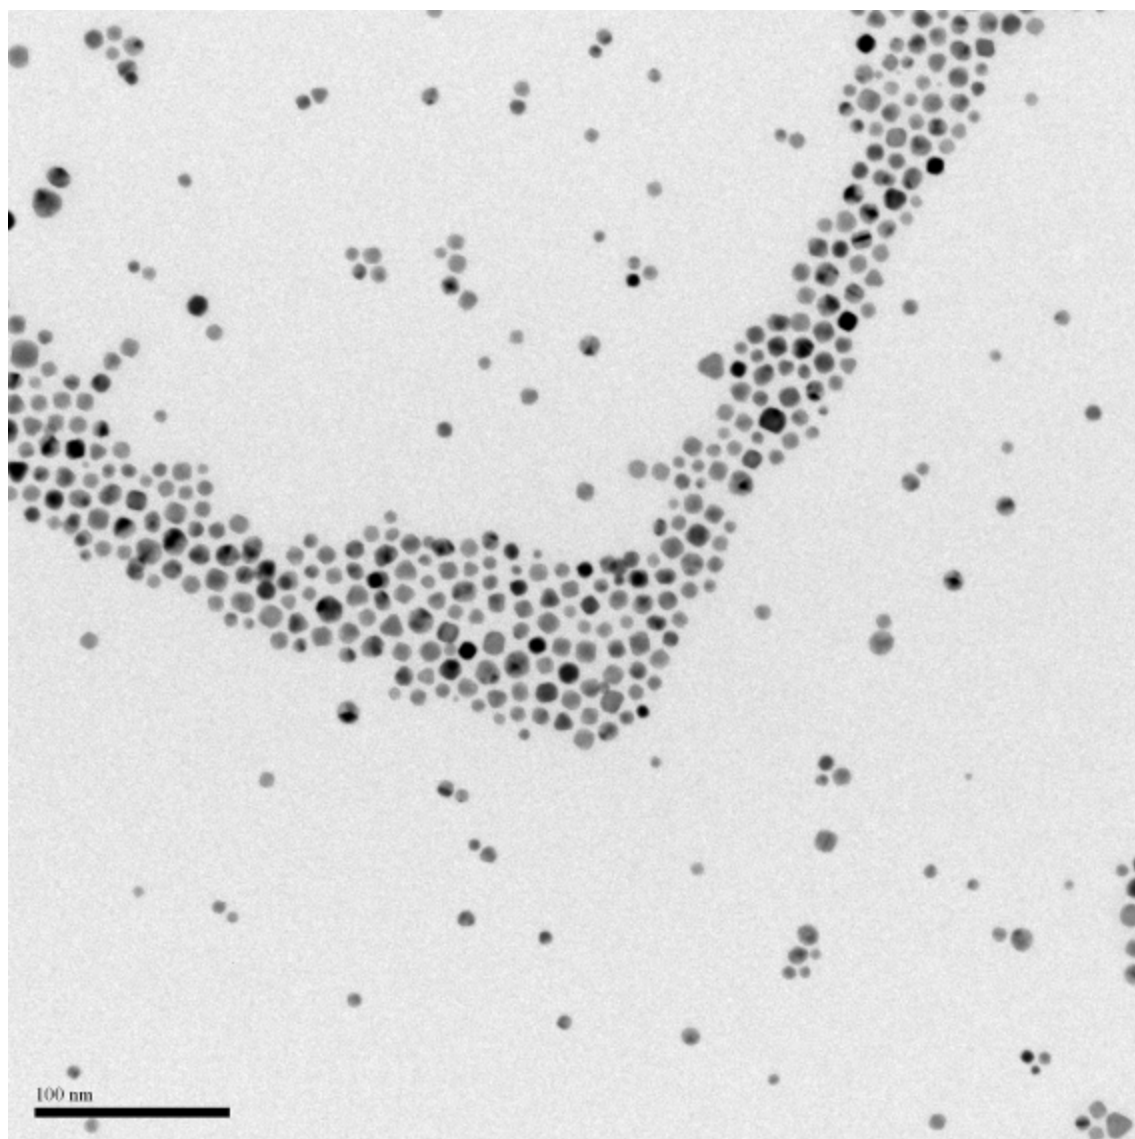

**S11.** TEM micrograph of Au nanoparticles obtained from the coating reaction of  $\text{MnFe}_2\text{O}_4$  without the magnetic seeds.

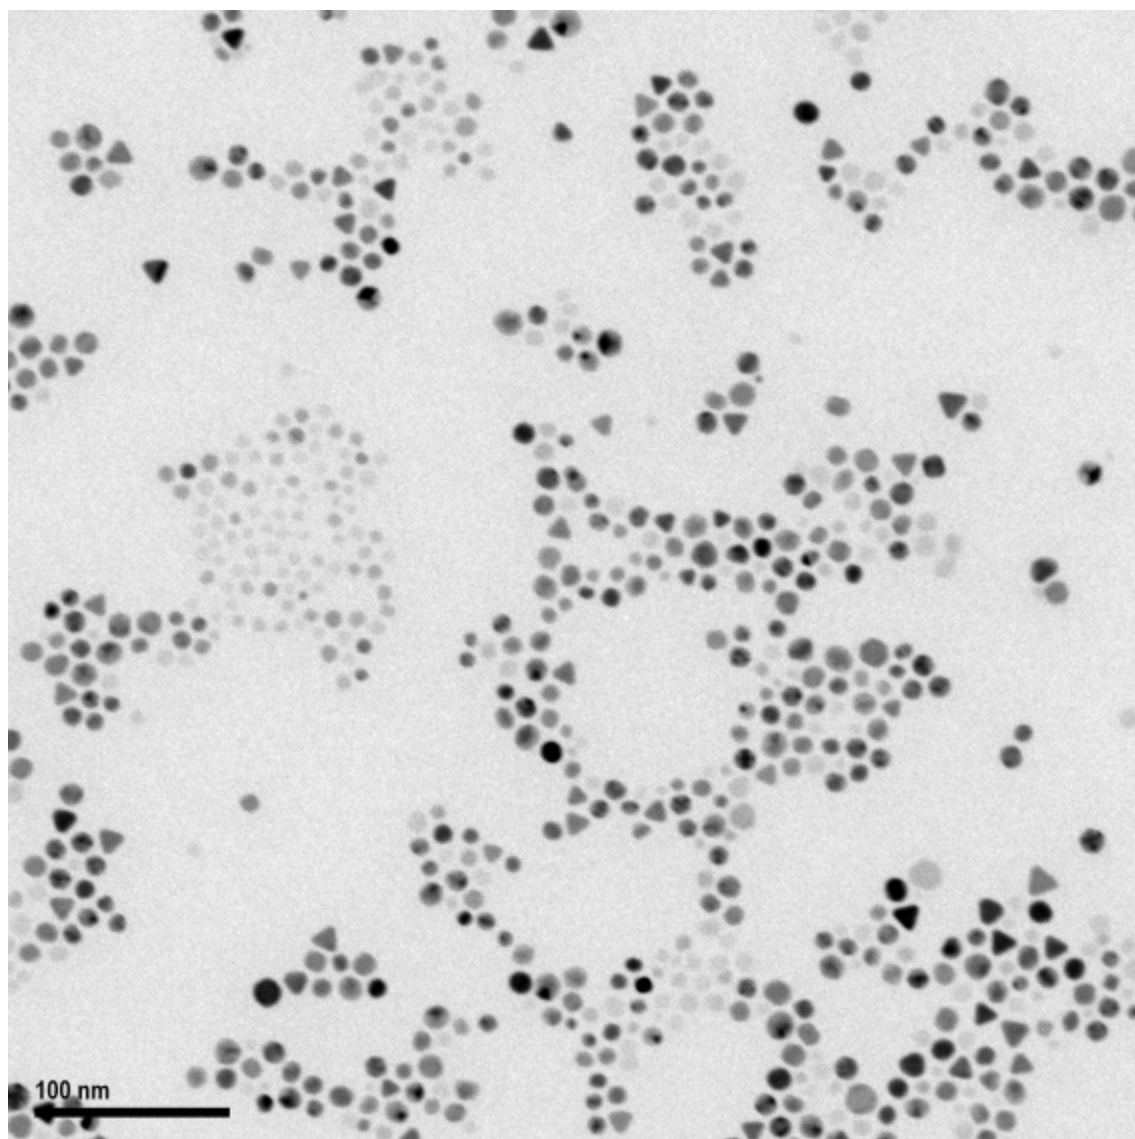

**S12.** TEM micrograph of nanoparticles obtained from the coating reaction of  $\text{MnFe}_2\text{O}_4$  with insufficient Au reagent.

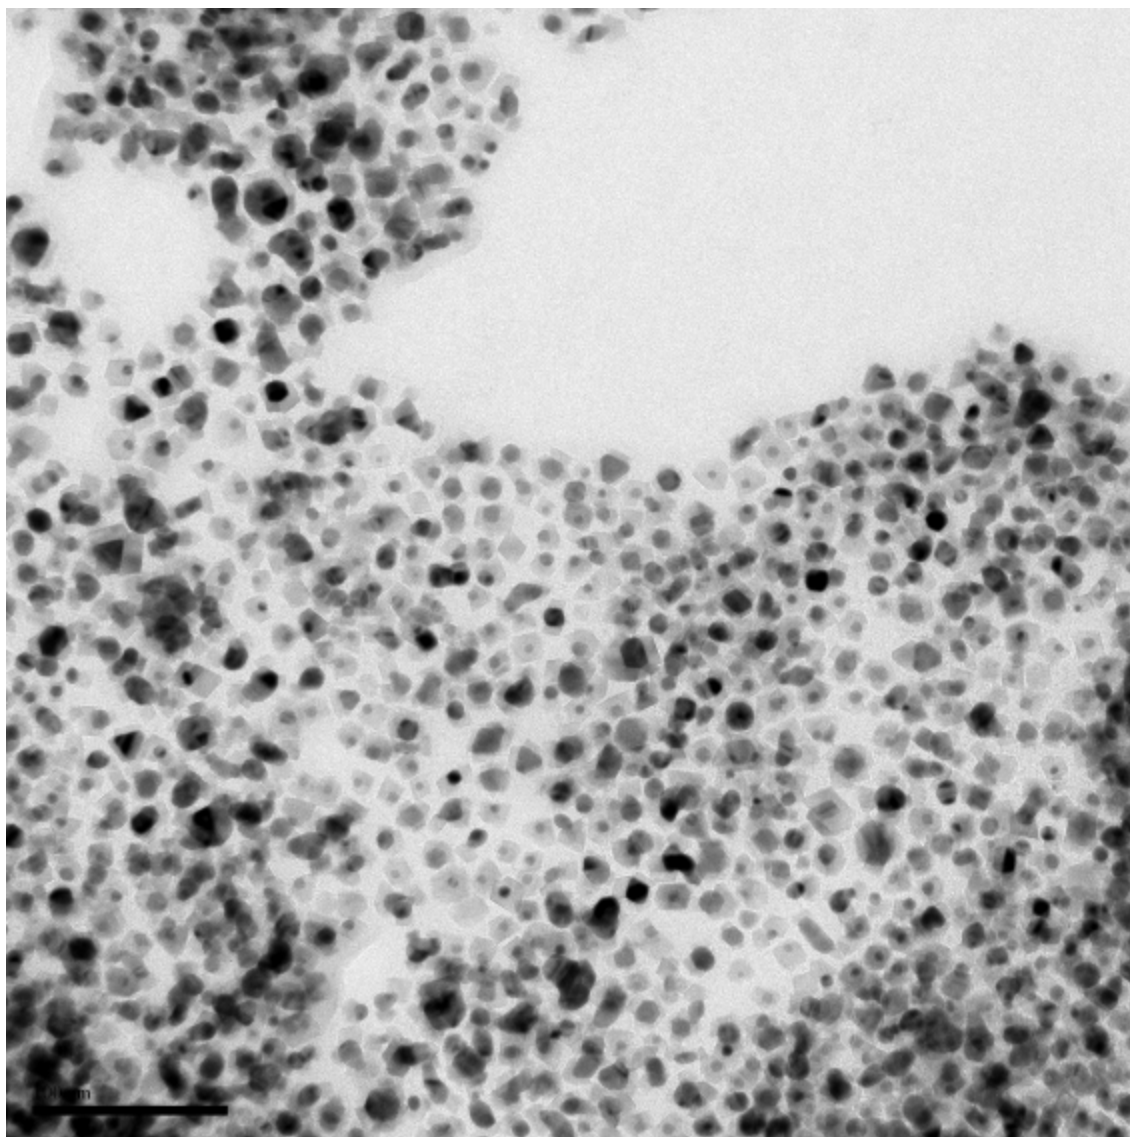

**S13.** TEM micrograph of Au@MnFe<sub>2</sub>O<sub>4</sub> structures obtained when the synthesis of the Mn ferrite cores was performed in the presence of Au reagent.



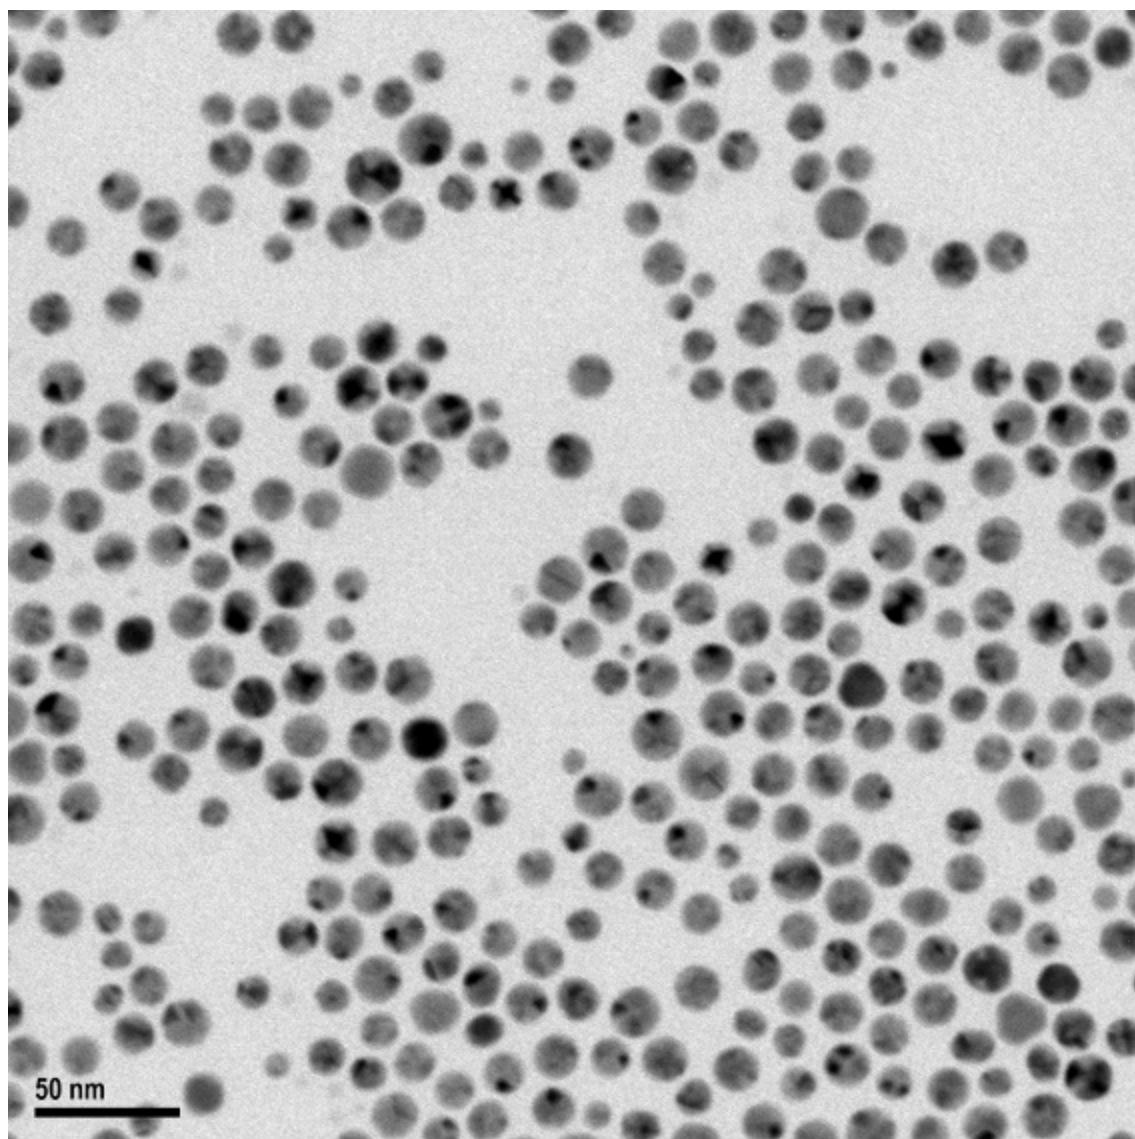

**S14.** TEM micrograph of MnFe<sub>2</sub>O<sub>4</sub>@Au nanoparticles obtained under the modified gold coating conditions.

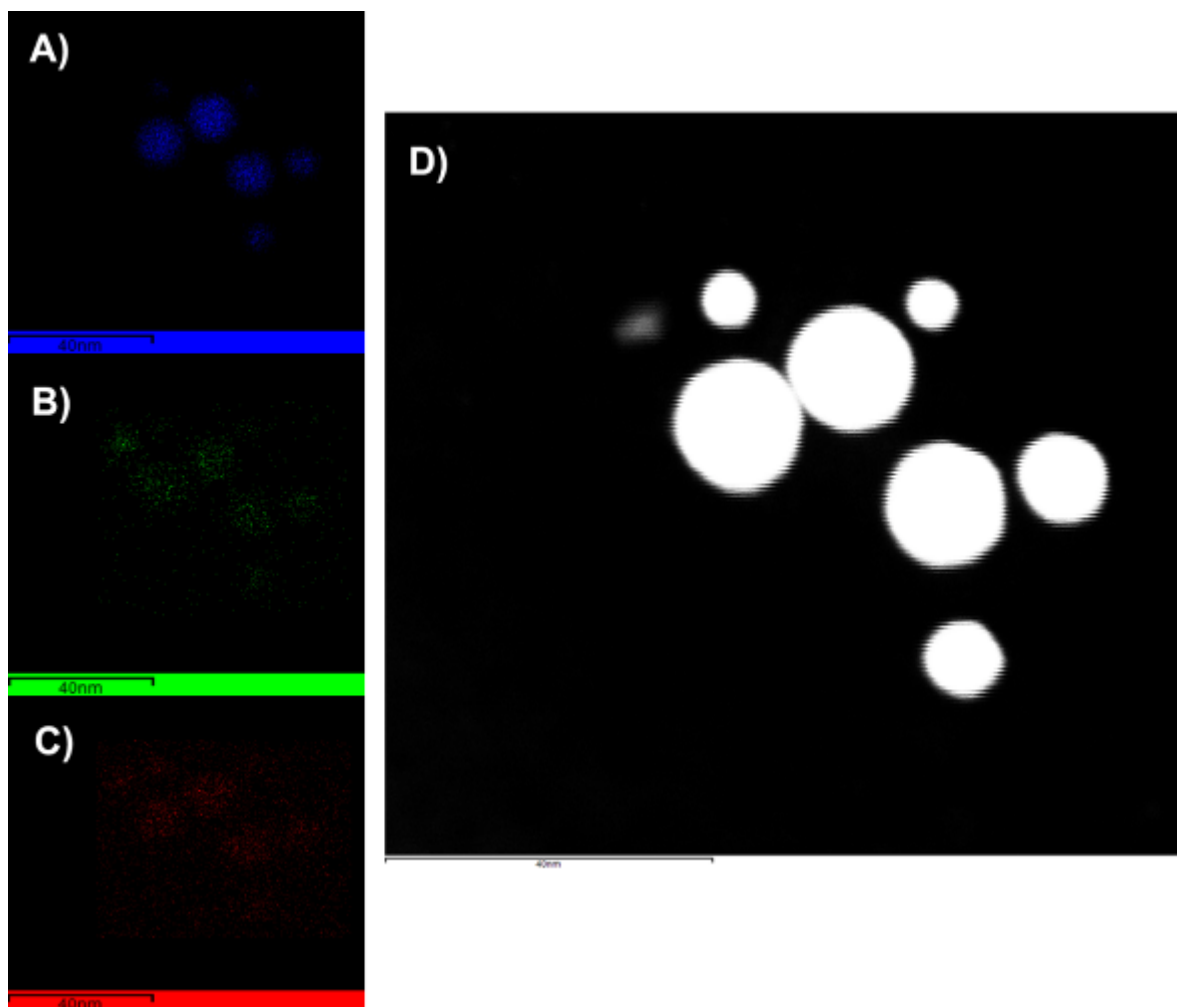

**S15.** STEM-EDXS elemental mapping of  $\text{MnFe}_2\text{O}_4@\text{Au}$  nanoparticles. **A)** Au map, **B)** Fe map, **C)** O map, **D)** STEM image.

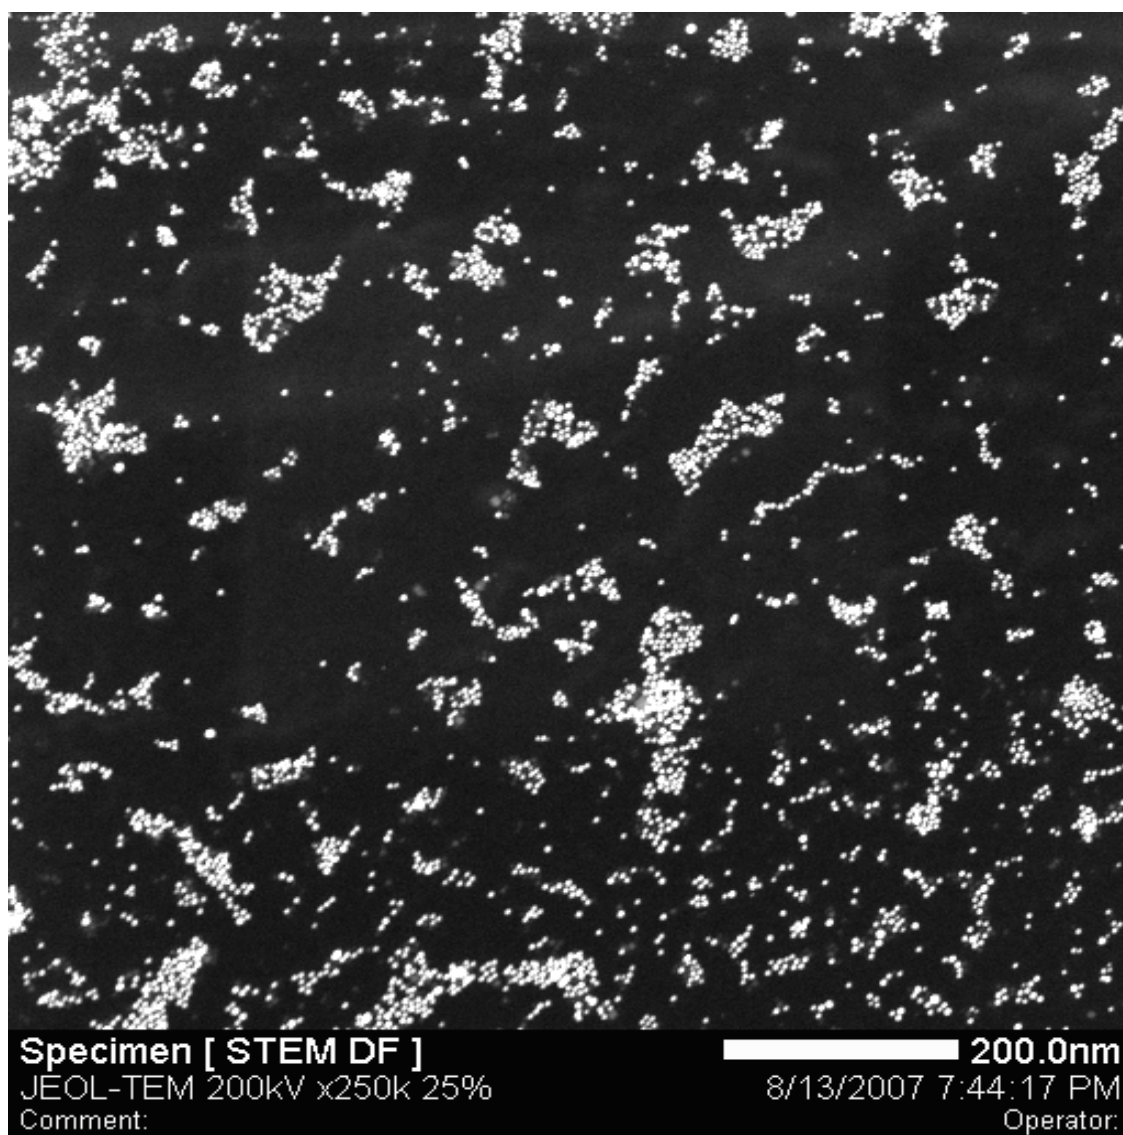

*S16.* STEM micrograph of  $\text{Fe}_3\text{O}_4@\text{Au}$  nanoparticles

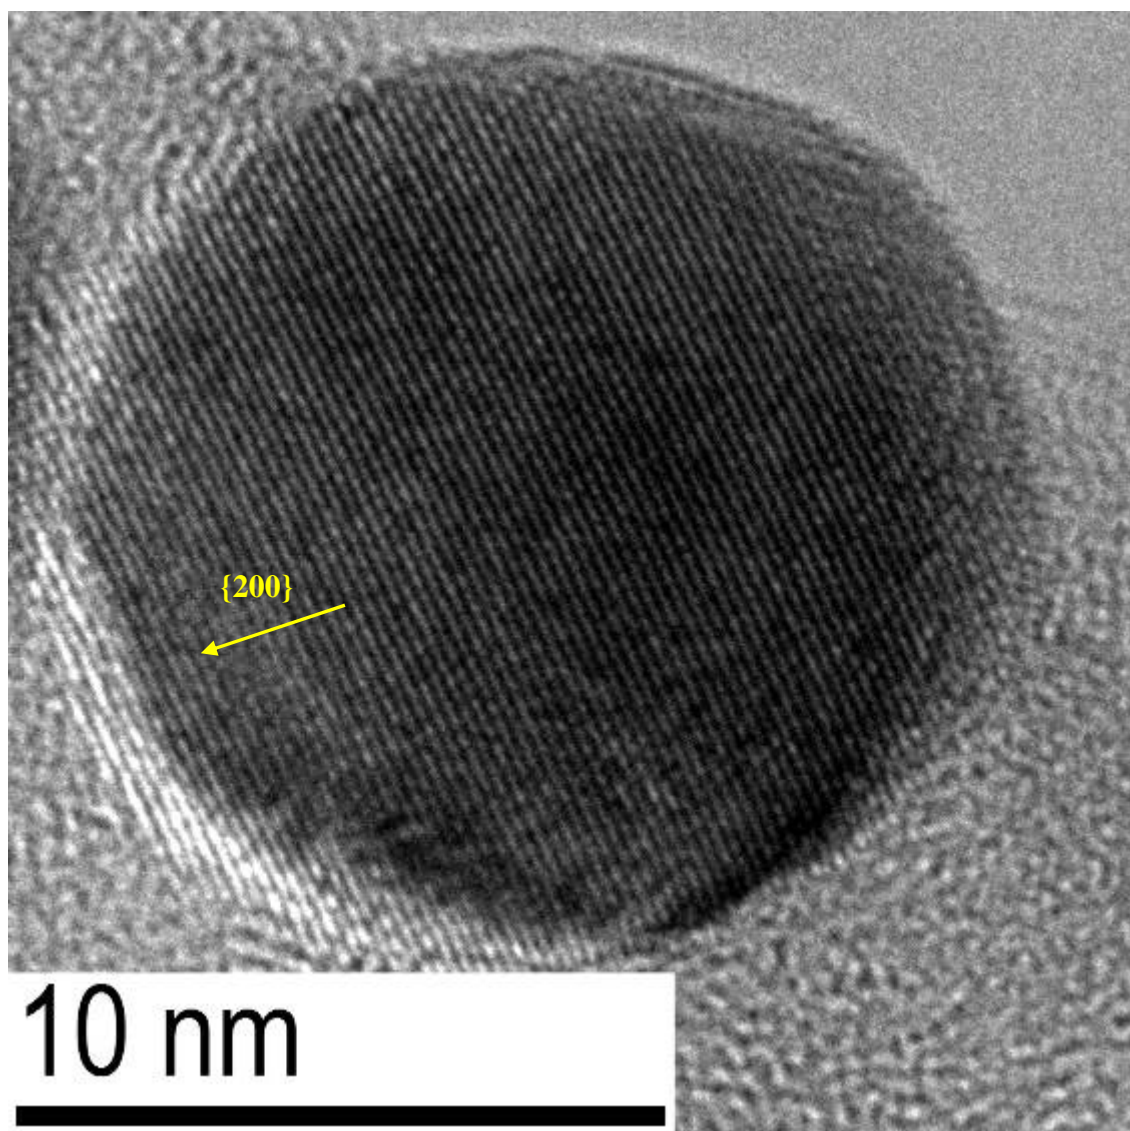

*S17.* HR TEM micrograph of MnFe<sub>2</sub>O<sub>4</sub>@Au nanoparticles. Lattice spacing is clearly visible and the spacing between fringes can be measured to be  $\sim 2.04$  Å, in agreement with {200} lattice planes of face-centred cubic (fcc) Au.

| ICP-OES analysis                                                  | Fe     | Mn     | Co     | Au      |
|-------------------------------------------------------------------|--------|--------|--------|---------|
| <b>Fe<sub>3</sub>O<sub>4</sub>@Au@LactC<sub>11</sub>/Linker</b>   | 25.2 % | 0 %    | 0 %    | 74.8 %  |
| <b>MnFe<sub>2</sub>O<sub>4</sub>@Au@LactC<sub>11</sub>/Linker</b> | 6.04 % | 2.54 % | 0 %    | 91.42 % |
| <b>CoFe<sub>2</sub>O<sub>4</sub>@Au@LactC<sub>11</sub>/Linker</b> | 6.72 % | 0 %    | 2.87 % | 90.43 % |

**S18.** ICP-OES analysis of the metal content of the three different *glyco*-ferrites. Previous to the ICP-OES analysis samples were solved in aqua regia.

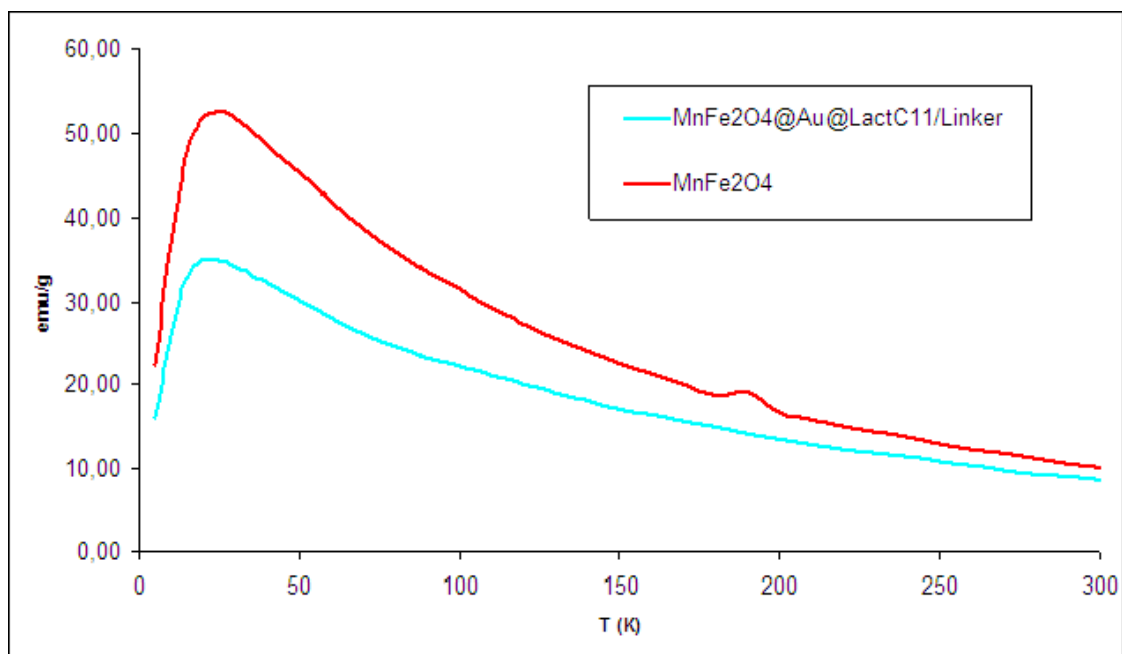

**S19.** Comparison of blocking temperature for MnFe<sub>2</sub>O<sub>4</sub> (red) and MnFe<sub>2</sub>O<sub>4</sub>@Au@LactC<sub>11</sub>/Linker (blue) at H = 100 Oe

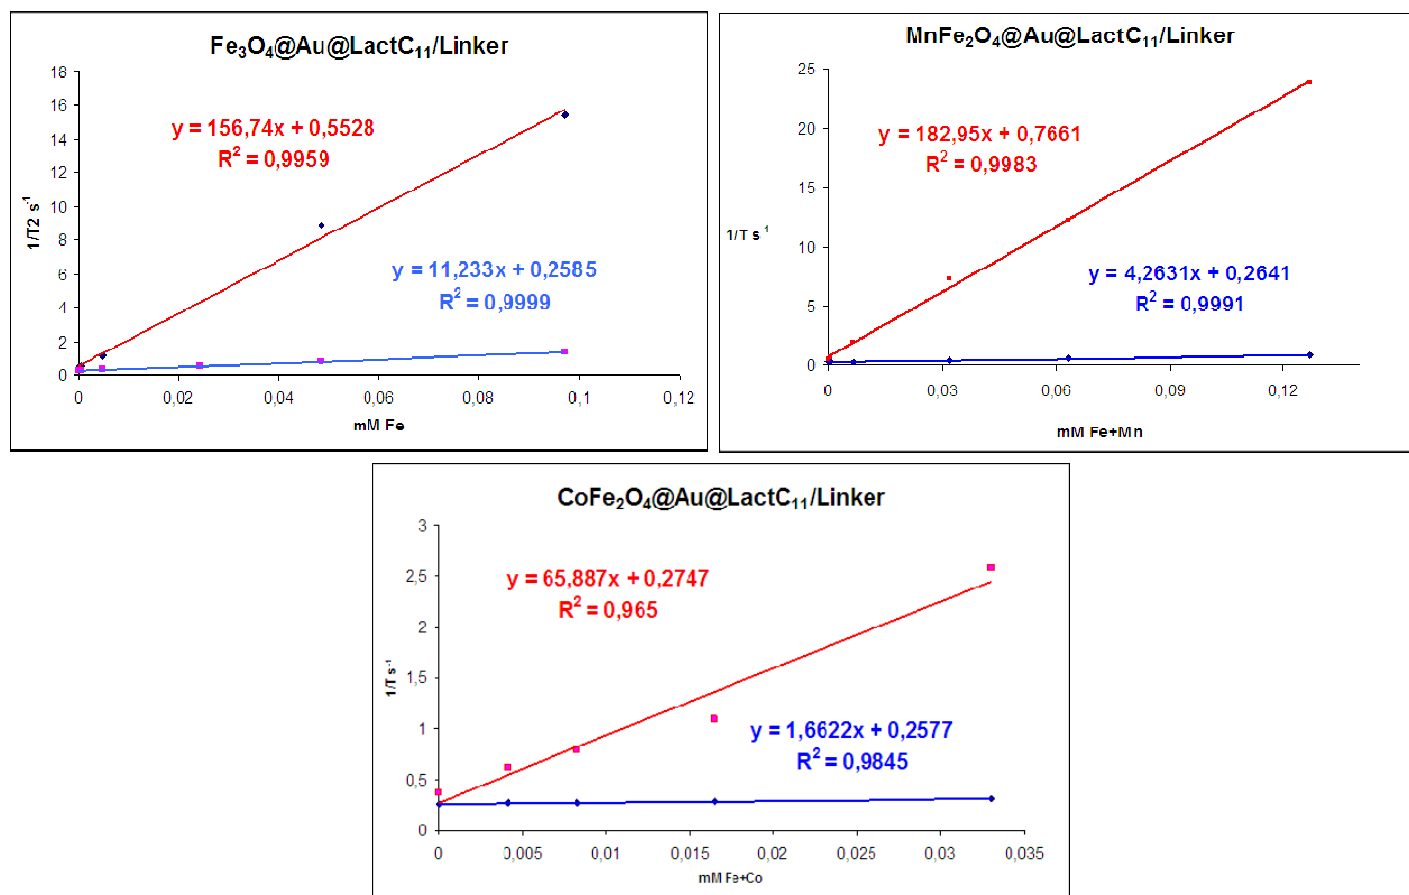

**S20.** Plots of the relaxivity rates vs the concentration of magnetic material to calculate the relaxivity values  $r_1$  (blue) and  $r_2$  (red) from the slope of the linear fit of the data. Plots of  $\text{Fe}_3\text{O}_4@\text{Au}@\text{LactC}_{11}/\text{Linker}$  (upper-left),  $\text{MnFe}_2\text{O}_4@\text{Au}@\text{LactC}_{11}/\text{Linker}$  (upper-right), and  $\text{CoFe}_2\text{O}_4@\text{Au}@\text{LactC}_{11}/\text{Linker}$  (bottom).



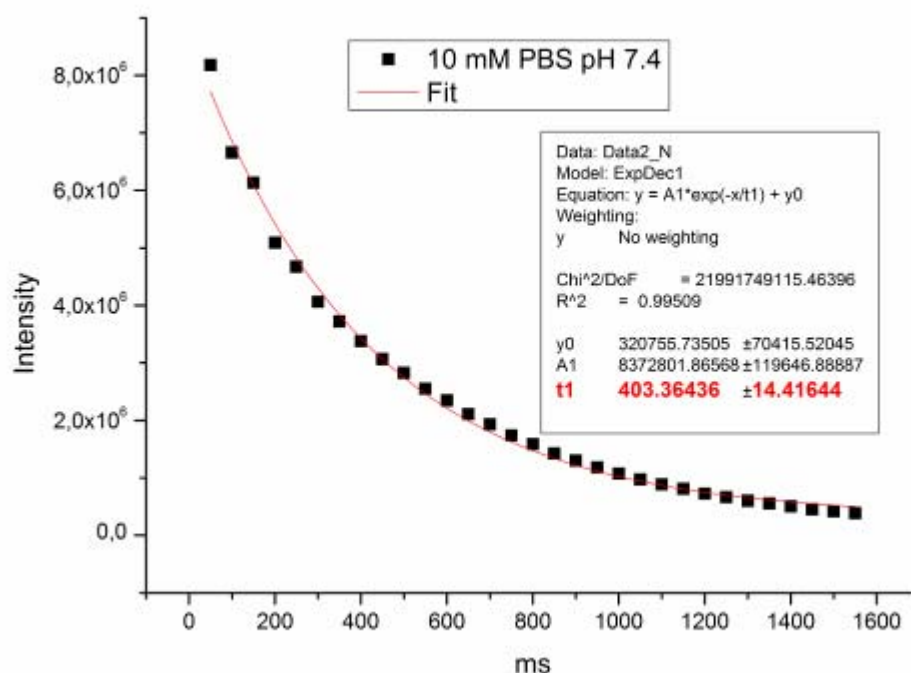

**S21.** T2 measurement of 10 mM PBS pH 7.4 obtained from MRI phantoms at 11.7 T.

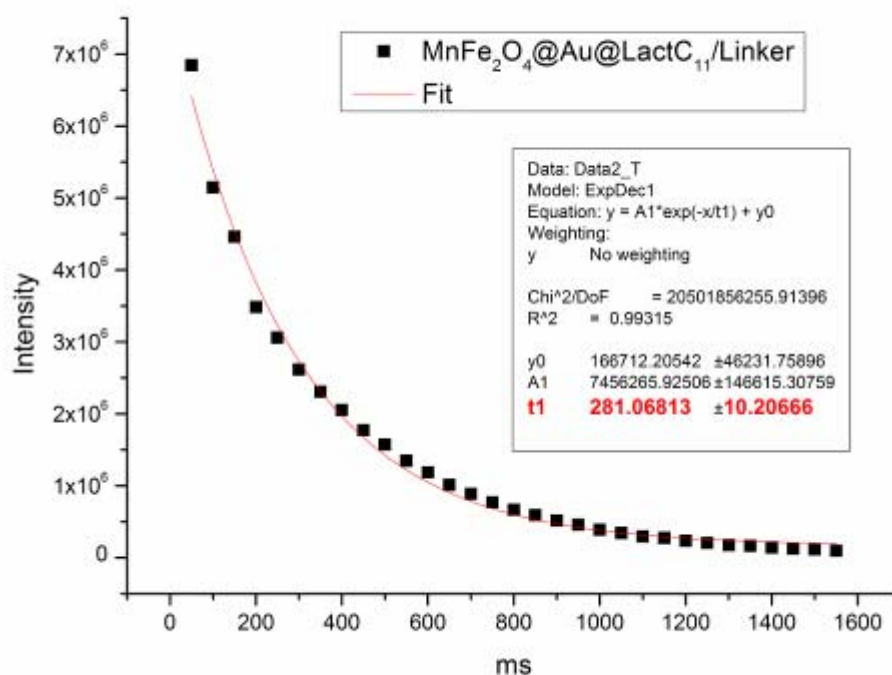

**S22.** T2 measurement of MnFe<sub>2</sub>O<sub>4</sub>@Au@LactC<sub>11</sub>/Linker at a concentration of 62.5 μM of magnetic material, obtained from MRI phantoms at 11.7 T.

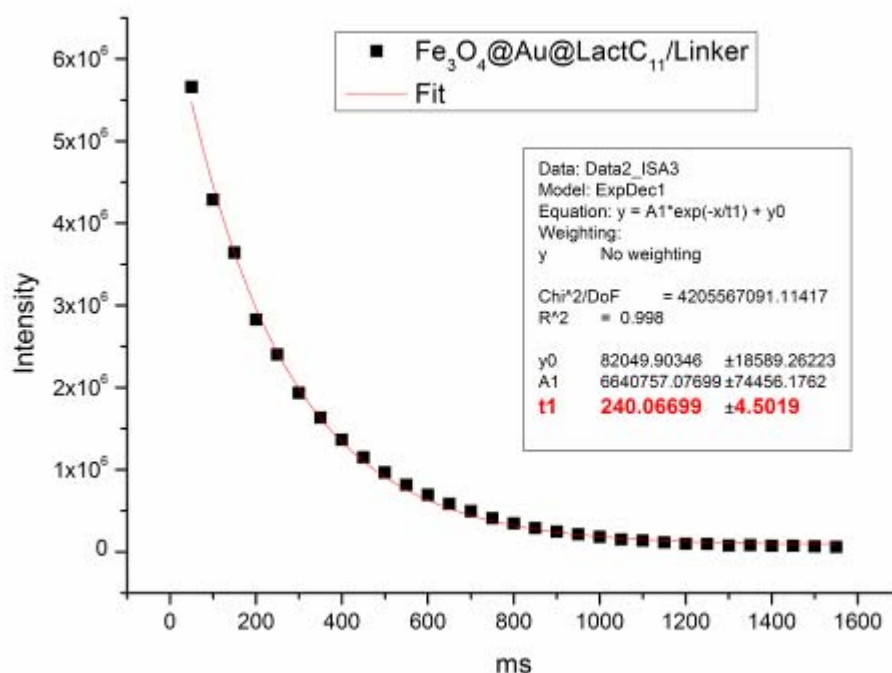

**S23.** T2 measurement of  $\text{Fe}_3\text{O}_4@\text{Au}@\text{LactC}_{11}/\text{Linker}$  at a concentration of 62.5  $\mu\text{M}$  of magnetic material, obtained from MRI phantoms at 11.7 T.

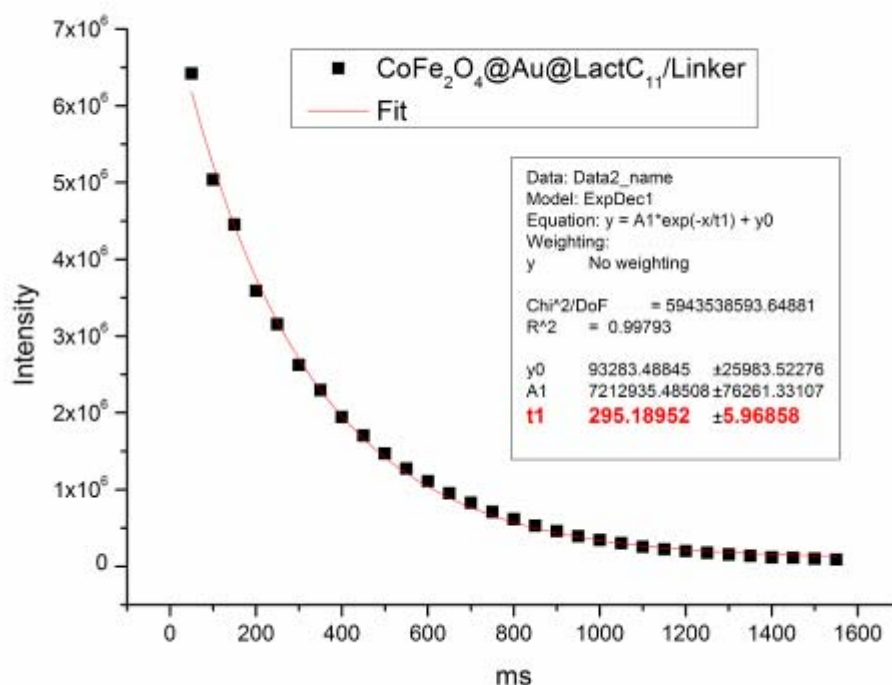

**S24.** T2 measurement of  $\text{CoFe}_2\text{O}_4@\text{Au}@\text{LactC}_{11}/\text{Linker}$  at a concentration of 62.5  $\mu\text{M}$  of magnetic material, obtained from MRI phantoms at 11.7 T.

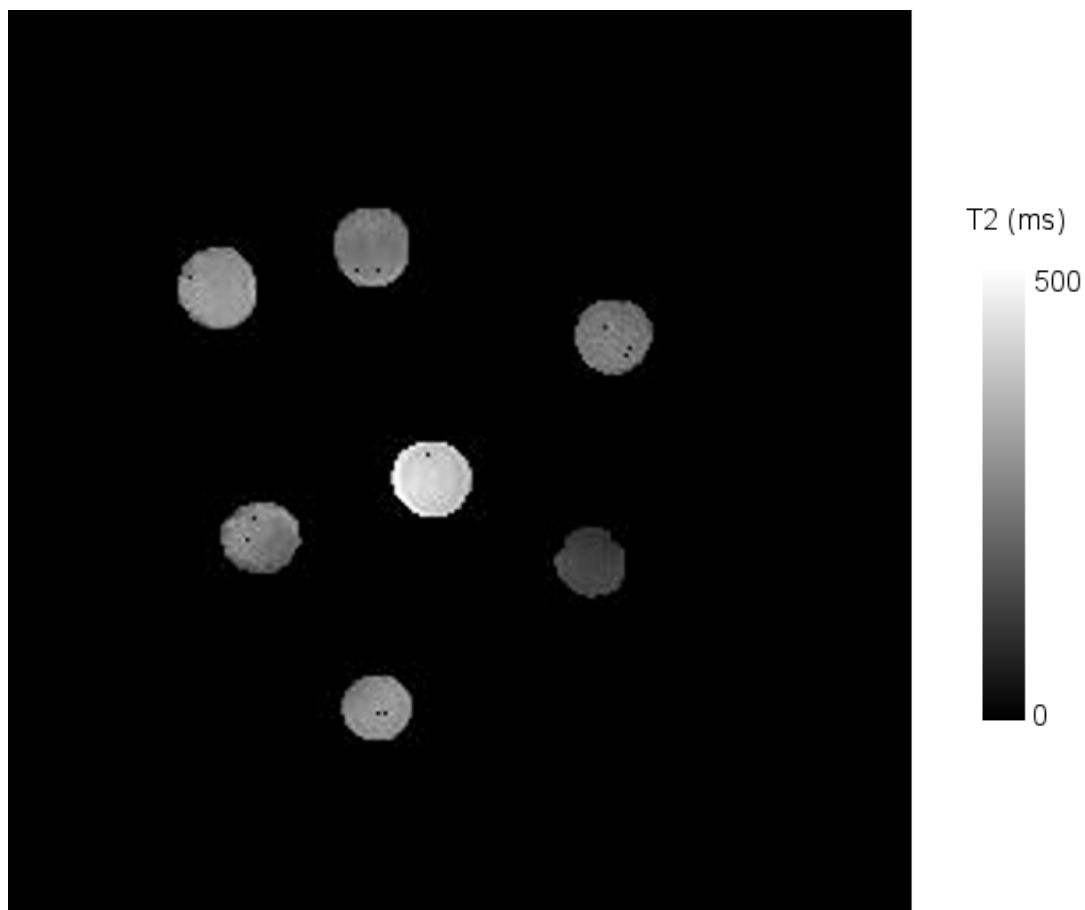

**S25.** T<sub>2</sub>-weighed MRI image of the different phantoms measured at 11.7 T.

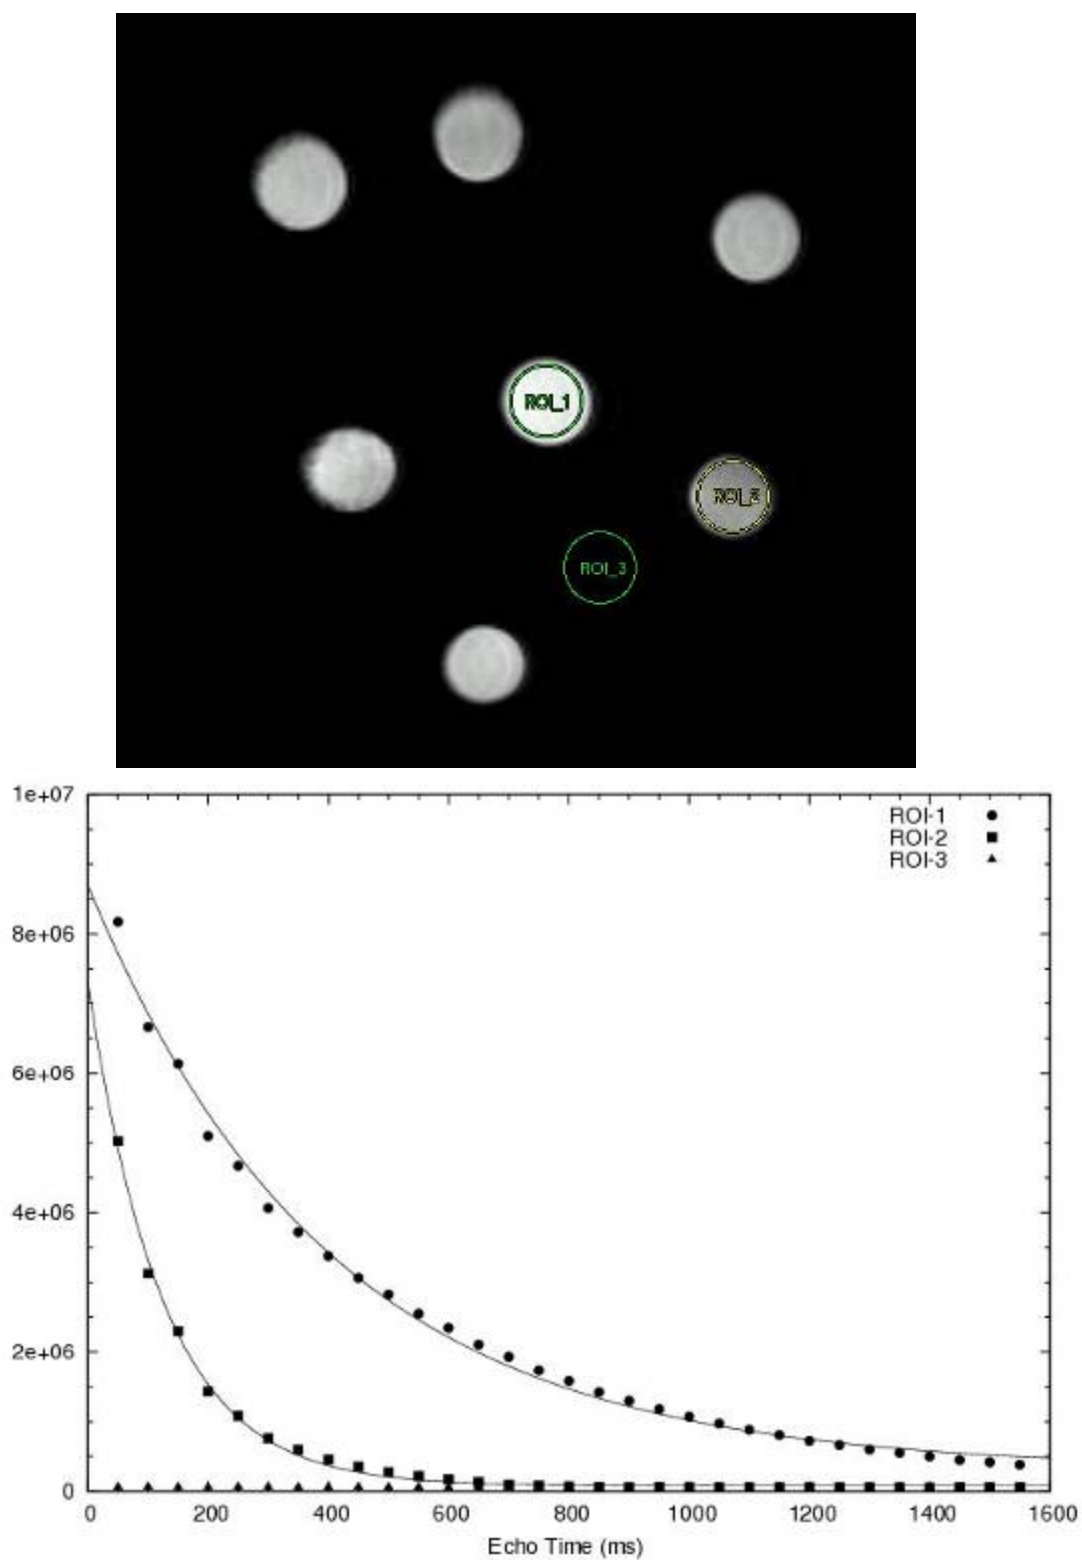

**S26.** Up, regions of interest (ROI) in the phantoms with the longest  $T_2$  (ROI\_1), the shortest  $T_2$  (ROI\_2), and the background (ROI\_3). Down,  $T_2$  plots of the three ROIs to demonstrate the difference between the signal and the noise (background).
